# Supplementary material
Source: PubMed Central journal article supplement (PMC6333896)
Supplement: supp_RA118.005489_140294_1_supp_229600_phg7sg.pdf [file supp_RA118.005489_140294_1_supp_229600_phg7sg.pdf]

## Supporting Information

### Movie. S1.

**The behavior of CPBS-injected crayfish at 3h.** A video records the individual behavior of crayfish at 3 h after CPBS injection. 20 crayfish were used in these experiments.

### Movie. S2.

**The effect of 75 µg cystamine/g injection on crayfish behavior at 3h.** A video records the behavior of crayfish at 3 h after 75 µg cystamine/g injection. 20 crayfish were used in these experiments.

### Movie. S3.

**The effect of 150 µg cystamine/g injection on crayfish behavior at 3h.** A video records the individual behavior of crayfish at 3 h after 150 µg cystamine/g injection. 20 crayfish were used in these experiments.

### Movie. S4.

**The behavior of CPBS-injected crayfish at 24h.** A video records the individual behavior of crayfish at 24h after CPBS injection. 20 crayfish were used in these experiments.

### Movie. S5.

**The effect of 75 µg cystamine/g injection on crayfish behavior at 24h.** A video records the individual behavior of crayfish at 24h after 75 µg cystamine/g injection. 20 crayfish were used in these experiments.

### Movie. S6.

**The effect of 150 µg cystamine/g injection on crayfish behavior at 24h.** A video records the individual behavior of crayfish at 24h after 150 µg cystamine/g injection. 20 crayfish were used in these experiments.
